# Supplementary material
Source: Springer Nature journal article supplement (https://www.springermedizin.de/resource/supplementary/12943_2011_855_MOESM6_ESM.pdf/9551856)

**A**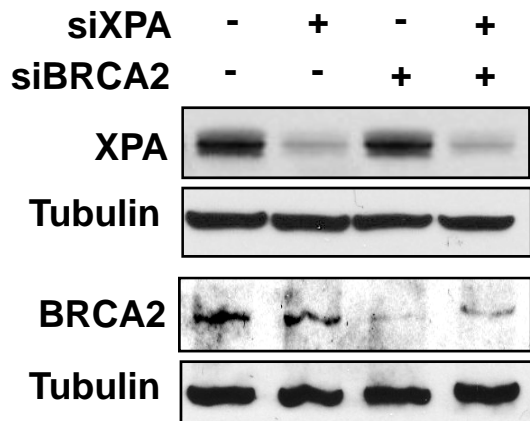**B**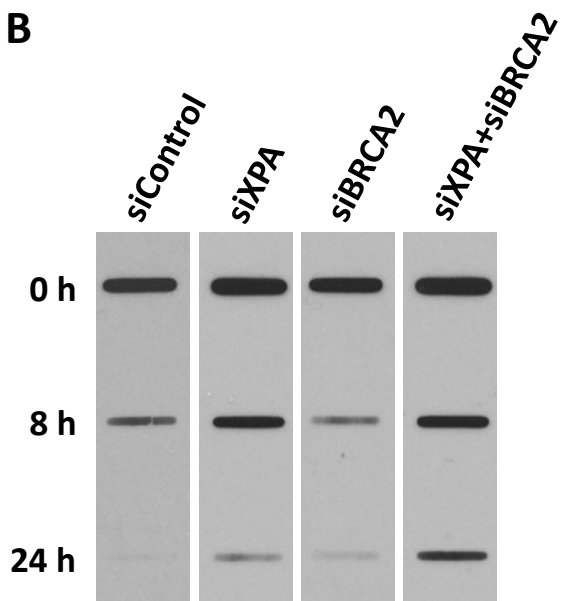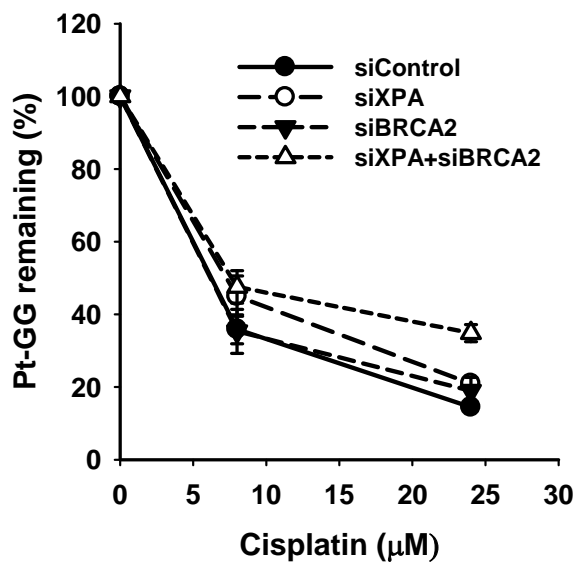**C**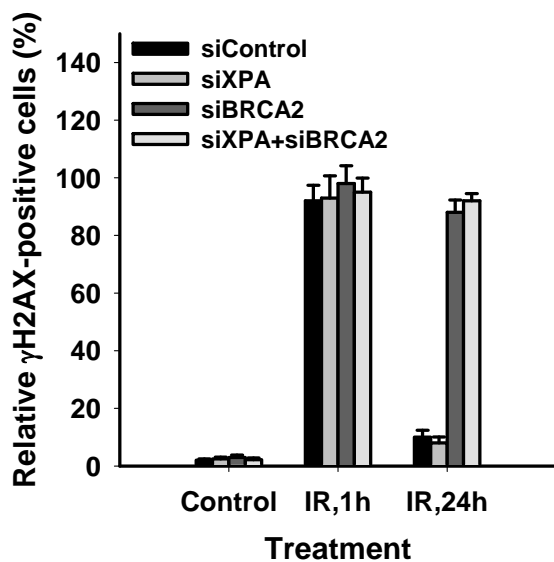**D**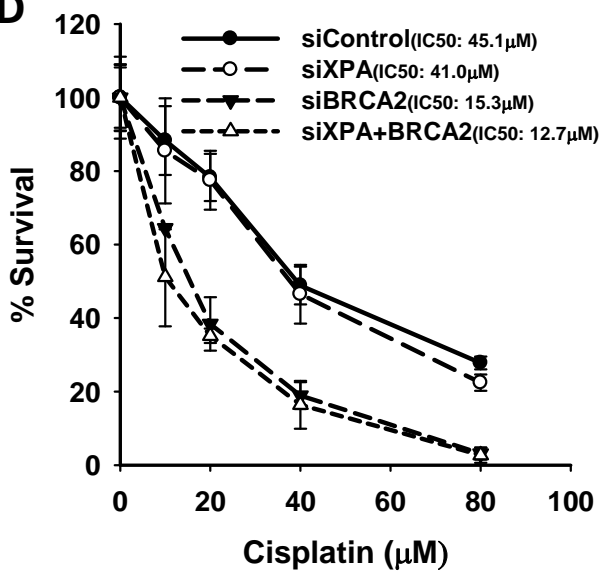

Supplement: MOESM6 [file 9551856]
